# Supplementary material for: Cactus: Algorithms for genome multiple sequence alignment
Source: HighWire-hosted journal article supplement (doi:10.1101/gr.123356.111), 2011-06-10
Supplement: cactusAlignmentSupplement.zip [file supplement.pdf › cactusAlignmentSupplement/supplement.pdf]

# Supplementary material for ‘Cactus: algorithms for genome multiple sequence alignment’

Benedict Paten<sup>\*1</sup>, Dent Earl<sup>1</sup>, Ngan Nguyen<sup>1</sup>, Mark Diekhans<sup>1</sup>, Daniel Zerbino<sup>1</sup>, David Haussler<sup>\*\*1</sup>

May 27, 2011

Corresponding authors \* benedict@soe.ucsc.edu \*\* haussler@soe.ucsc.edu

(1) Center for Biomolecular Science and Engineering, University of California Santa Cruz, CA,  
USA

Figures 1 and 2 show a macro view of the evolution of the Evolver mammals and primates simulations, respectively. Figure 3 shows the effect of disabling the repetitive transposition operation on the Evolver mammals simulation. Figures 4-8 show different examples of non-conserved primate exon alignments. Tables 1-8 show pairwise comparisons for the individual species in the Evolver mammals and Evolver primates simulations. Tables 9 and 10 detail exons which are conserved by Cactus but not Multiz, and vice versa.

## References

- [Fujita et al., 2011] Fujita, P. A., Rhead, B., Zweig, A. S., Hinrichs, A. S., Karolchik, D., Cline, M. S., Goldman, M., Barber, G. P., Clawson, H., Coelho, A., *et al.*, 2011. The ucsc genome browser database: update 2011. *Nucleic Acids Res*, **39**(Database issue):D876–82.

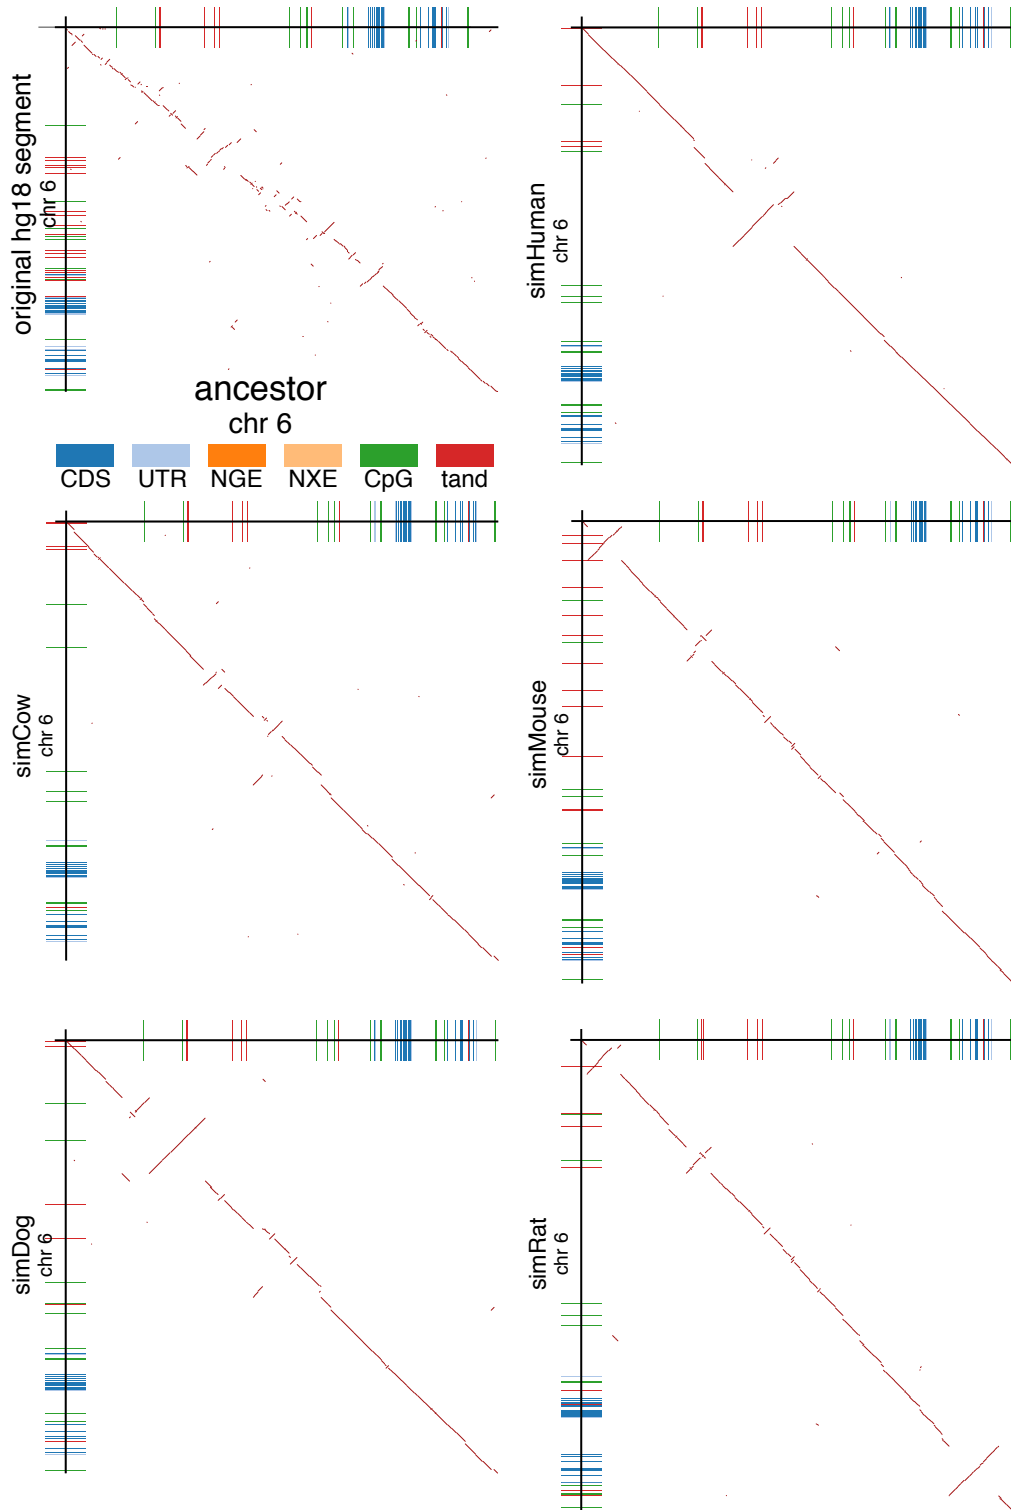

Figure 1: Dot-plots showing the large-scale events in the Evolver mammals simulation. In every plot the x axis is the MRCA. The y axes clockwise from top left: the original root genome, the simulated human, the simulated mouse, the simulated rat, the simulated dog and the simulated cow. Annotations are shown along the axes according to the colour key. CDS: coding sequence. UTR: untranslated region. NGE: non-genic constrained element, NXE = non-exonic (e.g. intronic ) constrained element, CpG: CpG island, tand: Tandem duplication.

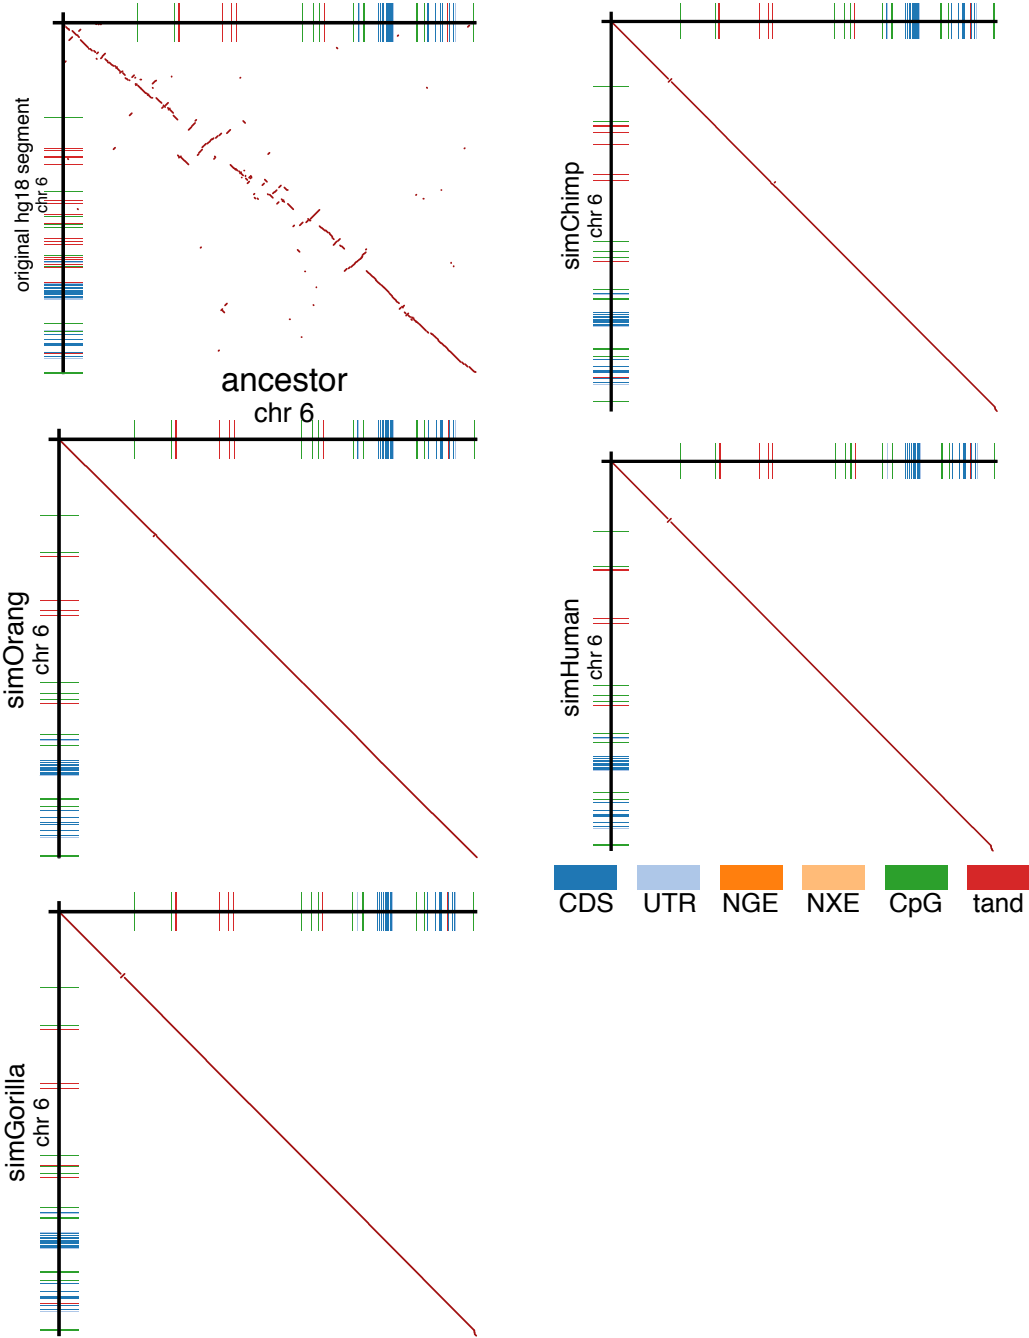

Figure 2: Dot-plots showing the large-scale events in the Evolver primates simulation. In every plot the x axis is the MRCA. The y axes clockwise from top left: the original root genome, the simulated chimp, the simulated human, the simulated gorilla and the simulated orangutan. Annotations are shown along the axes according to the colour key, same as in Figure 1.

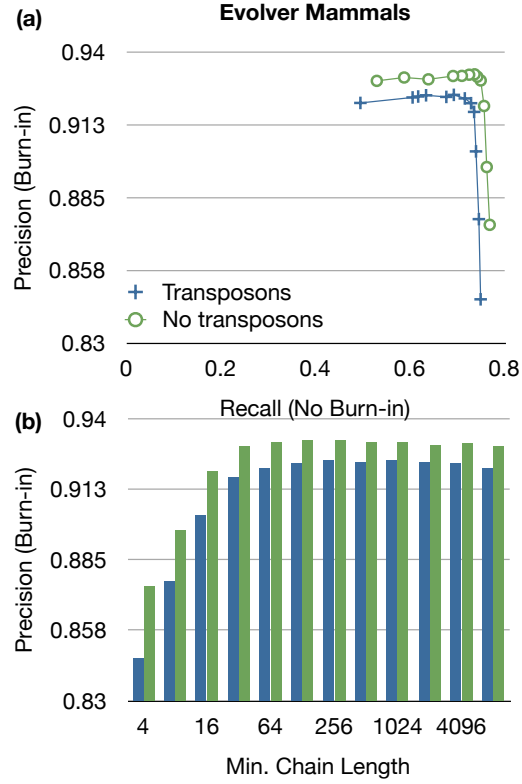

Figure 3: Comparing the effect of removing the repetitive transposition operation on two independent runs of the Evolver mammals simulation, one including and one without the operation. (a) A precision-recall plot of the predicted Cactus alignments showing the effect of altering  $\alpha$  in powers of 2 from 4 to 8192. (b) The precision as a function of  $\alpha$ .

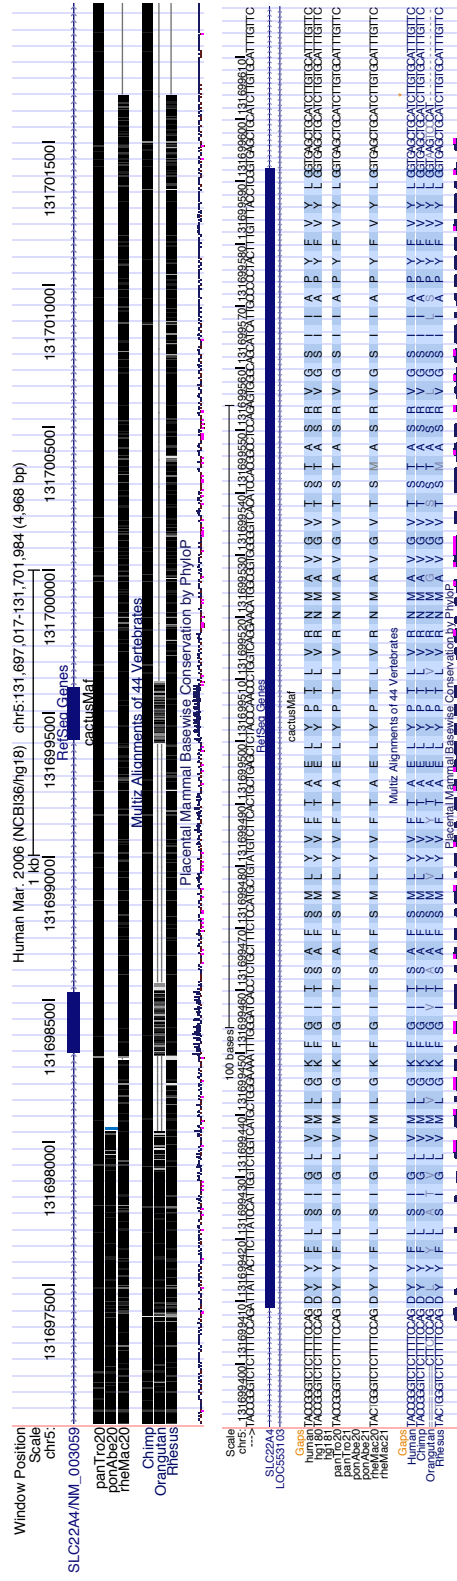

Figure 4: An example in which two exons in the SLC22A4 gene are conserved in the Multiz alignment, but non-conserved in the Cactus alignment due to a failure to align an orangutan sequence. Top, the exons in a 5 kilobase window. Bottom, a translated alignment view of the second missing exon. Multiz has aligned a sequence with 15 nonsynonymous mutations (in the first exon there are 17 such mutations). In contrast in this exon the rhesus sequence has just 1 nonsynonymous mutation, suggesting strongly that the aligned Orangutan sequence is not the true ortholog. Visualisation generated using the UCSC browser [Fujita et al., 2011].

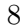

8







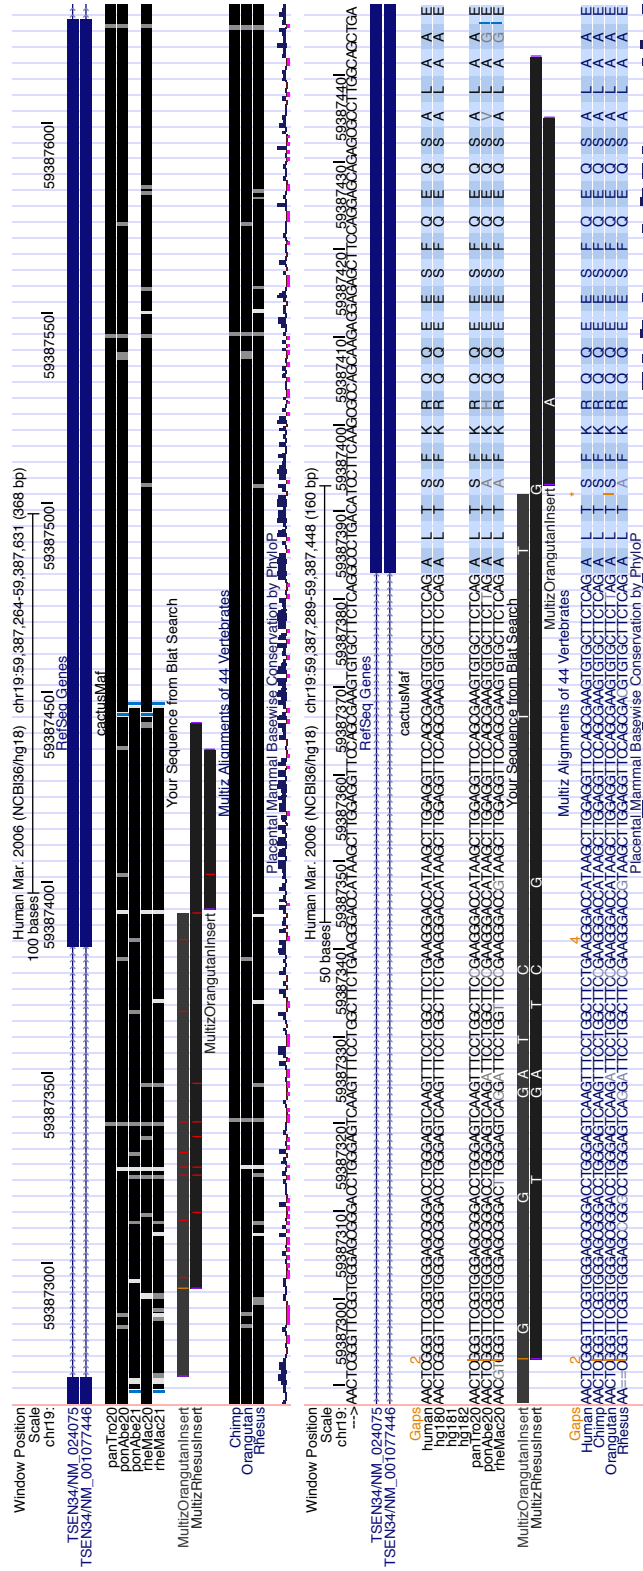

Figure 8: An example in which an exon is conserved in the Cactus alignment but non-conserved in the Multiz alignment, due to an apparent indel that actually arose by a tandem duplication. The first part of the exon is tandemly duplicated in both rhesus and orangutan. In the orangutan Multiz aligns the prefix of the first (5 prime) duplicated copy and the suffix of the second (3 prime) copy, creating an apparent 192 base pair insertion in the exon, while in Rhesus it correctly aligns only the second copy to the human exon. The cactus alignment contains both copies of the tandem duplication in both species. The Blat alignment shows the homology of the sequences unaligned by Multiz to the human sequence. Visualisation generated using the UCSC browser [Fujita et al., 2011].

Evolver Mammals Simulation

| Program      | Class      | Human-Dog   |             |             |             |             |             | Human-Mouse |             |             |             |    |  |
|--------------|------------|-------------|-------------|-------------|-------------|-------------|-------------|-------------|-------------|-------------|-------------|----|--|
|              |            | Burn-In     |             | No Burn-In  |             | F1          |             | Burn-In     |             | No Burn-In  |             | F1 |  |
|              |            | R.          | P.          | R.          | P.          |             |             | R.          | P.          | R.          | P.          |    |  |
| Cactus       | All        | <b>.585</b> | .946        | <b>.831</b> | .946        | <b>.885</b> | <b>.522</b> | <b>.911</b> | <b>.740</b> | <b>.911</b> | <b>.817</b> |    |  |
|              | No repeats | <b>.585</b> | .946        | <b>.831</b> | .946        | <b>.885</b> | <b>.522</b> | <b>.911</b> | <b>.740</b> | <b>.911</b> | <b>.817</b> |    |  |
|              | Repeats    | <b>.669</b> | <b>.780</b> | <b>.726</b> | <b>.780</b> | <b>.752</b> | <b>.574</b> | .796        | <b>.641</b> | .798        | <b>.710</b> |    |  |
|              | Near       | .646        | .976        | <b>.867</b> | .975        | <b>.918</b> | <b>.593</b> | .959        | <b>.794</b> | .958        | <b>.869</b> |    |  |
| Cactus(N.T.) | All        | .520        | <b>.947</b> | .739        | <b>.947</b> | .830        | .459        | .910        | .651        | .910        | .759        |    |  |
|              | No repeats | .520        | <b>.947</b> | .739        | <b>.947</b> | .830        | .459        | .910        | .651        | .910        | .759        |    |  |
|              | Repeats    | .598        | .776        | .650        | .776        | .707        | .496        | <b>.821</b> | .547        | <b>.821</b> | .656        |    |  |
|              | Near       | .574        | <b>.977</b> | .771        | <b>.976</b> | .862        | .522        | <b>.960</b> | .699        | <b>.959</b> | .809        |    |  |
| Pecan        | All        | .388        | .920        | .551        | .919        | .689        | .357        | .864        | .505        | .863        | .638        |    |  |
|              | No repeats | .388        | .920        | .551        | .919        | .689        | .357        | .864        | .505        | .863        | .638        |    |  |
|              | Repeats    | .488        | .721        | .530        | .721        | .611        | .419        | .771        | .462        | .771        | .578        |    |  |
|              | Near       | .429        | .954        | .576        | .952        | .719        | .410        | .922        | .548        | .919        | .687        |    |  |
| TBA          | All        | .470        | .836        | .667        | .835        | .742        | .459        | .794        | .650        | .793        | .715        |    |  |
|              | No repeats | .470        | .836        | .667        | .835        | .742        | .459        | .794        | .650        | .793        | .715        |    |  |
|              | Repeats    | .354        | .517        | .376        | .506        | .435        | .341        | .579        | .376        | .579        | .456        |    |  |
|              | Near       | .535        | .889        | .717        | .886        | .793        | .532        | .857        | .711        | .854        | .777        |    |  |
| TBA(ENCODE)  | All        | .483        | .790        | .684        | .788        | .733        | .463        | .794        | .655        | .792        | .718        |    |  |
|              | No repeats | .483        | .790        | .685        | .788        | .733        | .463        | .794        | .655        | .792        | .718        |    |  |
|              | Repeats    | .362        | .447        | .393        | .447        | .418        | .341        | .571        | .376        | .571        | .454        |    |  |
|              | Near       | .551        | .841        | .736        | .837        | .785        | .536        | .857        | .716        | .853        | .780        |    |  |
| Multiz       | All        | .574        | .851        | .807        | .843        | .828        | .470        | .793        | .664        | .789        | .723        |    |  |
|              | No repeats | .574        | .851        | .807        | .843        | .828        | .471        | .793        | .664        | .789        | .723        |    |  |
|              | Repeats    | .567        | .632        | .598        | .614        | .614        | .349        | .600        | .385        | .600        | .469        |    |  |
|              | Near       | <b>.651</b> | <b>.903</b> | <b>.866</b> | .893        | <b>.884</b> | <b>.545</b> | .857        | <b>.727</b> | .851        | <b>.786</b> |    |  |
| pMauve       | All        | .387        | .659        | .549        | .658        | .599        | .151        | .674        | .214        | .673        | .324        |    |  |
|              | No repeats | .386        | .659        | .549        | .658        | .599        | .151        | .674        | .214        | .673        | .324        |    |  |
|              | Repeats    | .433        | .529        | .470        | .529        | .498        | .155        | .556        | .171        | .556        | .261        |    |  |
|              | Near       | .431        | .689        | .579        | .688        | .629        | .173        | .722        | .232        | .720        | .352        |    |  |

Table 1: Comparisons using the Evolver Mammals dataset. Format of the table is the same as in Table 1 of the main paper.

Evolver Mammals Simulation

| Program      | Class      | Human-Cow   |             |             |             |             |             | Mouse-Rat   |             |             |             |    |  |
|--------------|------------|-------------|-------------|-------------|-------------|-------------|-------------|-------------|-------------|-------------|-------------|----|--|
|              |            | Burn-In     |             | No Burn-In  |             | F1          |             | Burn-In     |             | No Burn-In  |             | F1 |  |
|              |            | R.          | P.          | R.          | P.          |             |             | R.          | P.          | R.          | P.          |    |  |
| Cactus       | All        | <b>.576</b> | .939        | <b>.818</b> | <b>.939</b> | <b>.874</b> | <b>.590</b> | .961        | <b>.787</b> | .963        | <b>.865</b> |    |  |
|              | No repeats | <b>.576</b> | .939        | <b>.818</b> | <b>.939</b> | <b>.874</b> | <b>.590</b> | .961        | <b>.787</b> | .963        | <b>.865</b> |    |  |
|              | Repeats    | <b>.596</b> | .730        | <b>.675</b> | .730        | <b>.701</b> | <b>.694</b> | .861        | <b>.724</b> | .874        | <b>.786</b> |    |  |
|              | Near       | <b>.638</b> | <b>.972</b> | <b>.857</b> | <b>.971</b> | <b>.911</b> | <b>.643</b> | .972        | <b>.817</b> | .973        | <b>.887</b> |    |  |
| Cactus(N.T.) | All        | .502        | <b>.940</b> | .713        | <b>.939</b> | .811        | .554        | <b>.964</b> | .739        | <b>.966</b> | .837        |    |  |
|              | No repeats | .502        | <b>.940</b> | .713        | <b>.939</b> | .811        | .554        | <b>.964</b> | .739        | <b>.966</b> | .837        |    |  |
|              | Repeats    | .529        | <b>.774</b> | .600        | <b>.774</b> | .676        | .638        | .856        | .661        | .870        | .746        |    |  |
|              | Near       | .557        | <b>.972</b> | .748        | <b>.971</b> | .845        | .603        | <b>.973</b> | .766        | <b>.975</b> | .857        |    |  |
| Pecan        | All        | .458        | .911        | .650        | .910        | .759        | .486        | .959        | .648        | .961        | .774        |    |  |
|              | No repeats | .458        | .911        | .650        | .910        | .759        | .486        | .959        | .648        | .961        | .774        |    |  |
|              | Repeats    | .478        | .691        | .542        | .691        | .607        | .587        | <b>.878</b> | .609        | <b>.893</b> | .719        |    |  |
|              | Near       | .510        | .948        | .685        | .946        | .795        | .528        | .968        | .671        | .970        | .793        |    |  |
| TBA          | All        | .481        | .840        | .682        | .838        | .753        | .573        | .944        | .765        | .946        | .845        |    |  |
|              | No repeats | .481        | .840        | .682        | .838        | .753        | .573        | .944        | .765        | .946        | .845        |    |  |
|              | Repeats    | .331        | .529        | .375        | .529        | .439        | .663        | .850        | .687        | .863        | .760        |    |  |
|              | Near       | .550        | .896        | .737        | .893        | .809        | .624        | .955        | .793        | .957        | .867        |    |  |
| TBA(ENCODE)  | All        | .454        | .798        | .643        | .795        | .712        | .573        | .944        | .765        | .946        | .845        |    |  |
|              | No repeats | .454        | .799        | .643        | .795        | .712        | .573        | .944        | .765        | .946        | .845        |    |  |
|              | Repeats    | .346        | .511        | .392        | .511        | .443        | .663        | .850        | .687        | .863        | .760        |    |  |
|              | Near       | .521        | .853        | .695        | .848        | .766        | .624        | .955        | .793        | .957        | .867        |    |  |
| Multiz       | All        | .553        | .842        | .780        | .837        | .810        | .435        | .915        | .580        | .916        | .710        |    |  |
|              | No repeats | .553        | .842        | .780        | .837        | .810        | .435        | .915        | .580        | .916        | .710        |    |  |
|              | Repeats    | .471        | .587        | .533        | .587        | .559        | .179        | .660        | .193        | .698        | .298        |    |  |
|              | Near       | <b>.631</b> | .897        | <b>.841</b> | .890        | .868        | .476        | .927        | .602        | .927        | .730        |    |  |
| pMauve       | All        | .344        | .602        | .489        | .601        | .539        | .335        | .571        | .446        | .572        | .501        |    |  |
|              | No repeats | .344        | .602        | .489        | .601        | .539        | .335        | .571        | .446        | .572        | .501        |    |  |
|              | Repeats    | .331        | .388        | .375        | .388        | .381        | .429        | .519        | .448        | .531        | .481        |    |  |
|              | Near       | .386        | .632        | .519        | .631        | .570        | .366        | .580        | .465        | .581        | .516        |    |  |

Table 2: Comparisons using the Evolver Mammals dataset. Format of the table is the same as in Table 1 of the main paper.

Evolver Mammals Simulation

| Program      | Class      | Mouse-Dog |      |            |      |      |      | Mouse-Cow |      |            |      |      |      |
|--------------|------------|-----------|------|------------|------|------|------|-----------|------|------------|------|------|------|
|              |            | Burn-In   |      | No Burn-In |      | F1   |      | Burn-In   |      | No Burn-In |      | F1   |      |
|              |            | R.        | P.   | R.         | P.   |      |      | R.        | P.   | R.         | P.   |      |      |
| Cactus       | All        | .502      | .898 | .712       | .897 | .794 | .494 | .894      | .894 | .702       | .892 | .787 | .787 |
|              | No repeats | .502      | .898 | .712       | .897 | .794 | .494 | .894      | .894 | .702       | .892 | .787 | .787 |
|              | Repeats    | .602      | .725 | .610       | .725 | .662 | .469 | .716      | .525 | .716       | .716 | .606 | .606 |
|              | Near       | .575      | .953 | .770       | .950 | .852 | .568 | .951      | .762 | .948       | .846 | .846 | .846 |
| Cactus(N.T.) | All        | .425      | .899 | .603       | .898 | .722 | .408 | .896      | .580 | .895       | .704 | .704 | .704 |
|              | No repeats | .425      | .899 | .603       | .898 | .722 | .408 | .896      | .580 | .895       | .704 | .704 | .704 |
|              | Repeats    | .506      | .700 | .512       | .700 | .592 | .389 | .746      | .436 | .733       | .550 | .550 | .550 |
|              | Near       | .487      | .955 | .652       | .952 | .775 | .469 | .953      | .629 | .951       | .758 | .758 | .758 |
| Pecan        | All        | .301      | .841 | .426       | .839 | .566 | .349 | .830      | .495 | .828       | .620 | .620 | .620 |
|              | No repeats | .301      | .841 | .426       | .839 | .566 | .349 | .830      | .495 | .828       | .620 | .620 | .620 |
|              | Repeats    | .434      | .632 | .439       | .632 | .518 | .310 | .574      | .347 | .574       | .432 | .432 | .432 |
|              | Near       | .349      | .905 | .467       | .902 | .616 | .406 | .897      | .544 | .893       | .677 | .677 | .677 |
| TBA          | All        | .426      | .753 | .603       | .751 | .670 | .434 | .753      | .615 | .751       | .677 | .677 | .677 |
|              | No repeats | .426      | .753 | .604       | .751 | .670 | .434 | .753      | .615 | .751       | .677 | .677 | .677 |
|              | Repeats    | .313      | .456 | .317       | .456 | .374 | .327 | .536      | .366 | .536       | .435 | .435 | .435 |
|              | Near       | .499      | .819 | .667       | .815 | .735 | .511 | .823      | .683 | .819       | .746 | .746 | .746 |
| TBA(ENCODE)  | All        | .450      | .722 | .638       | .720 | .677 | .429 | .733      | .609 | .731       | .665 | .665 | .665 |
|              | No repeats | .450      | .722 | .638       | .720 | .677 | .429 | .733      | .609 | .731       | .666 | .666 | .666 |
|              | Repeats    | .398      | .398 | .402       | .398 | .400 | .319 | .500      | .356 | .500       | .416 | .416 | .416 |
|              | Near       | .528      | .787 | .706       | .783 | .744 | .507 | .803      | .677 | .798       | .734 | .734 | .734 |
| Multiz       | All        | .417      | .770 | .591       | .768 | .669 | .409 | .760      | .579 | .757       | .657 | .657 | .657 |
|              | No repeats | .417      | .770 | .591       | .769 | .669 | .409 | .760      | .579 | .757       | .658 | .658 | .658 |
|              | Repeats    | .301      | .463 | .305       | .463 | .368 | .248 | .491      | .277 | .491       | .354 | .354 | .354 |
|              | Near       | .489      | .839 | .654       | .835 | .735 | .482 | .831      | .643 | .826       | .725 | .725 | .725 |
| pMauve       | All        | .160      | .732 | .226       | .730 | .346 | .143 | .669      | .202 | .667       | .311 | .311 | .311 |
|              | No repeats | .160      | .732 | .226       | .731 | .346 | .143 | .669      | .202 | .667       | .311 | .311 | .311 |
|              | Repeats    | .120      | .556 | .122       | .556 | .200 | .080 | .346      | .089 | .346       | .142 | .142 | .142 |
|              | Near       | .185      | .792 | .249       | .789 | .378 | .166 | .725      | .222 | .722       | .340 | .340 | .340 |

Table 3: Comparisons using the Evolver Mammals dataset. Format of the table is the same as in Table 1 of the main paper.

Evolver Mammals Simulation

| Program      | Class      | Rat-Human |      |            |      | Rat-Dog |      |            |      |      |      |
|--------------|------------|-----------|------|------------|------|---------|------|------------|------|------|------|
|              |            | Burn-In   |      | No Burn-In |      | Burn-In |      | No Burn-In |      |      |      |
|              |            | R.        | P.   | R.         | P.   | R.      | P.   | R.         | P.   |      |      |
| Cactus       | All        | .522      | .911 | .738       | .911 | .815    | .502 | .898       | .710 | .897 | .793 |
|              | No repeats | .522      | .911 | .738       | .911 | .815    | .502 | .898       | .710 | .897 | .793 |
|              | Repeats    | .617      | .791 | .677       | .800 | .729    | .590 | .737       | .615 | .737 | .670 |
|              | Near       | .592      | .960 | .791       | .959 | .867    | .575 | .953       | .768 | .951 | .850 |
| Cactus(N.T.) | All        | .458      | .910 | .646       | .910 | .756    | .423 | .900       | .599 | .899 | .719 |
|              | No repeats | .458      | .910 | .646       | .910 | .756    | .423 | .900       | .599 | .899 | .719 |
|              | Repeats    | .532      | .815 | .585       | .826 | .681    | .490 | .700       | .510 | .700 | .590 |
|              | Near       | .520      | .960 | .694       | .959 | .805    | .485 | .955       | .648 | .954 | .772 |
| Pecan        | All        | .304      | .866 | .429       | .864 | .574    | .252 | .843       | .357 | .841 | .501 |
|              | No repeats | .304      | .866 | .429       | .864 | .574    | .252 | .843       | .357 | .841 | .501 |
|              | Repeats    | .355      | .735 | .385       | .735 | .505    | .390 | .684       | .406 | .684 | .510 |
|              | Near       | .349      | .921 | .464       | .919 | .618    | .292 | .906       | .390 | .903 | .545 |
| TBA          | All        | .453      | .791 | .639       | .790 | .707    | .422 | .750       | .596 | .747 | .664 |
|              | No repeats | .453      | .791 | .639       | .790 | .707    | .422 | .750       | .596 | .748 | .664 |
|              | Repeats    | .390      | .561 | .431       | .571 | .487    | .290 | .460       | .302 | .460 | .365 |
|              | Near       | .524      | .854 | .698       | .851 | .768    | .495 | .816       | .659 | .812 | .729 |
| TBA(ENCODE)  | All        | .459      | .790 | .646       | .788 | .711    | .450 | .718       | .635 | .716 | .674 |
|              | No repeats | .459      | .790 | .646       | .788 | .711    | .450 | .718       | .635 | .716 | .674 |
|              | Repeats    | .390      | .556 | .431       | .566 | .485    | .390 | .402       | .406 | .402 | .404 |
|              | Near       | .532      | .853 | .707       | .849 | .773    | .528 | .784       | .703 | .780 | .741 |
| Multiz       | All        | .467      | .780 | .656       | .777 | .713    | .415 | .760       | .586 | .758 | .662 |
|              | No repeats | .467      | .780 | .656       | .777 | .713    | .415 | .760       | .586 | .758 | .662 |
|              | Repeats    | .411      | .547 | .454       | .557 | .496    | .280 | .431       | .292 | .431 | .348 |
|              | Near       | .541      | .844 | .719       | .839 | .776    | .488 | .829       | .649 | .825 | .728 |
| pMauve       | All        | .107      | .469 | .151       | .468 | .229    | .118 | .536       | .167 | .535 | .255 |
|              | No repeats | .107      | .469 | .151       | .468 | .229    | .118 | .536       | .167 | .535 | .255 |
|              | Repeats    | .092      | .283 | .100       | .283 | .148    | .070 | .280       | .073 | .280 | .116 |
|              | Near       | .123      | .501 | .164       | .500 | .248    | .137 | .579       | .183 | .578 | .278 |

Table 4: Comparisons using the Evolver Mammals dataset. Format of the table is the same as in Table 1 of the main paper.

| Evolver Mammals Simulation |            |             |             |             |             |             |
|----------------------------|------------|-------------|-------------|-------------|-------------|-------------|
| Program                    | Class      | Rat-Cow     |             |             |             |             |
|                            |            | Burn-In     |             | No Burn-In  |             | F1          |
|                            |            | R.          | P.          | R.          | P.          |             |
| Cactus                     | All        | <b>.494</b> | .893        | <b>.699</b> | .892        | <b>.784</b> |
|                            | No repeats | <b>.494</b> | .893        | <b>.699</b> | .892        | <b>.784</b> |
|                            | Repeats    | <b>.496</b> | .722        | <b>.564</b> | .722        | <b>.633</b> |
|                            | Near       | <b>.568</b> | .950        | <b>.759</b> | .948        | <b>.844</b> |
| Cactus(N.T.)               | All        | .408        | <b>.897</b> | .577        | <b>.896</b> | .702        |
|                            | No repeats | .408        | <b>.897</b> | .577        | <b>.896</b> | .702        |
|                            | Repeats    | .400        | <b>.754</b> | .455        | <b>.742</b> | .568        |
|                            | Near       | .469        | <b>.954</b> | .626        | <b>.952</b> | .756        |
| Pecan                      | All        | .295        | .826        | .417        | .825        | .554        |
|                            | No repeats | .295        | .826        | .417        | .825        | .554        |
|                            | Repeats    | .287        | .579        | .317        | .561        | .410        |
|                            | Near       | .344        | .892        | .458        | .889        | .605        |
| TBA                        | All        | .430        | .750        | .607        | .748        | .671        |
|                            | No repeats | .430        | .750        | .607        | .748        | .671        |
|                            | Repeats    | .296        | .507        | .337        | .507        | .405        |
|                            | Near       | .507        | .820        | .674        | .815        | .740        |
| TBA(ENCODE)                | All        | .430        | .730        | .607        | .727        | .663        |
|                            | No repeats | .430        | .730        | .607        | .727        | .663        |
|                            | Repeats    | .304        | .461        | .347        | .461        | .395        |
|                            | Near       | .508        | .799        | .675        | .794        | .732        |
| Multiz                     | All        | .407        | .747        | .574        | .745        | .649        |
|                            | No repeats | .407        | .748        | .574        | .745        | .649        |
|                            | Repeats    | .252        | .453        | .287        | .453        | .352        |
|                            | Near       | .480        | .819        | .638        | .814        | .717        |
| pMauve                     | All        | .100        | .469        | .142        | .468        | .218        |
|                            | No repeats | .100        | .469        | .142        | .468        | .218        |
|                            | Repeats    | .061        | .189        | .069        | .189        | .101        |
|                            | Near       | .117        | .508        | .156        | .506        | .239        |

Table 5: Comparisons using the Evolver Mammals dataset. Format of the table is the same as in Table 1 of the main paper.



Evolver Primates Simulation

| Program      | Class      | Human-Chimp |             |             |             |             |             | Human-Gorilla |             |             |             |             |             |
|--------------|------------|-------------|-------------|-------------|-------------|-------------|-------------|---------------|-------------|-------------|-------------|-------------|-------------|
|              |            | Burn-In     |             | No Burn-In  |             | F1          |             | Burn-In       |             | No Burn-In  |             | F1          |             |
|              |            | R.          | P.          | R.          | P.          | R.          | P.          | R.            | P.          | R.          | P.          | R.          | P.          |
| Cactus       | All        | .709        | .993        | .990        | .981        | .992        | .710        | .993          | .991        | .981        | .992        | .992        | .992        |
|              | No repeats | .709        | .993        | .990        | .981        | .992        | .710        | .993          | .991        | .981        | .992        | .992        | .992        |
|              | Repeats    | .853        | .938        | .961        | .938        | .949        | .821        | .934          | .948        | .934        | .941        | .941        | .941        |
|              | Near       | .748        | .993        | .992        | .981        | .993        | .749        | .993          | .993        | .981        | .993        | .993        | .993        |
| Cactus(N.T.) | All        | .698        | <b>.999</b> | .987        | .998        | <b>.993</b> | .699        | .998          | .987        | .998        | <b>.993</b> | <b>.993</b> | <b>.993</b> |
|              | No repeats | .698        | <b>.999</b> | .987        | .998        | <b>.993</b> | .699        | .998          | .987        | .998        | <b>.993</b> | <b>.993</b> | <b>.993</b> |
|              | Repeats    | .853        | <b>.999</b> | .961        | <b>.999</b> | <b>.980</b> | .821        | .977          | .948        | .977        | <b>.962</b> | <b>.962</b> | <b>.962</b> |
|              | Near       | .736        | <b>.999</b> | .989        | .998        | <b>.994</b> | .737        | <b>.999</b>   | .988        | .998        | <b>.994</b> | <b>.994</b> | <b>.994</b> |
| Pecan        | All        | .696        | <b>.999</b> | .985        | <b>.999</b> | .992        | .698        | <b>.999</b>   | .987        | <b>.999</b> | <b>.993</b> | <b>.993</b> | <b>.993</b> |
|              | No repeats | .696        | <b>.999</b> | .985        | <b>.999</b> | .992        | .698        | <b>.999</b>   | .987        | <b>.999</b> | <b>.993</b> | <b>.993</b> | <b>.993</b> |
|              | Repeats    | .846        | .992        | .953        | .992        | .972        | .814        | <b>.984</b>   | .941        | <b>.984</b> | <b>.962</b> | <b>.962</b> | <b>.962</b> |
|              | Near       | .734        | <b>.999</b> | .987        | <b>.999</b> | .993        | .736        | <b>.999</b>   | .988        | <b>.999</b> | <b>.994</b> | <b>.994</b> | <b>.994</b> |
| TBA          | All        | .698        | .997        | .987        | .997        | .992        | .696        | .998          | .983        | .998        | .991        | .991        | .991        |
|              | No repeats | .698        | .997        | .987        | .997        | .992        | .696        | .998          | .983        | .998        | .991        | .991        | .991        |
|              | Repeats    | .853        | .992        | .961        | .992        | .976        | .814        | <b>.984</b>   | .941        | <b>.984</b> | <b>.962</b> | <b>.962</b> | <b>.962</b> |
|              | Near       | .736        | .997        | .989        | .997        | .993        | .734        | <b>.999</b>   | .985        | <b>.999</b> | .992        | .992        | .992        |
| TBA(ENCODE)  | All        | <b>.722</b> | .950        | <b>.993</b> | .923        | .971        | .716        | .979          | .987        | .954        | .983        | .983        | .983        |
|              | No repeats | <b>.722</b> | .950        | <b>.993</b> | .923        | .971        | .716        | .979          | .987        | .954        | .983        | .983        | .983        |
|              | Repeats    | <b>.867</b> | .879        | <b>.976</b> | .879        | .925        | .821        | .914          | .948        | .914        | .931        | .931        | .931        |
|              | Near       | <b>.762</b> | .950        | <b>.995</b> | .923        | .972        | .756        | .979          | .989        | .954        | .984        | .984        | .984        |
| Multiz       | All        | <b>.722</b> | .950        | <b>.993</b> | .923        | .971        | <b>.723</b> | .955          | <b>.993</b> | .928        | .974        | .974        | .974        |
|              | No repeats | <b>.722</b> | .950        | <b>.993</b> | .923        | .971        | <b>.723</b> | .955          | <b>.993</b> | .928        | .974        | .974        | .974        |
|              | Repeats    | <b>.867</b> | .879        | <b>.976</b> | .879        | .925        | <b>.827</b> | .908          | <b>.956</b> | .908        | .931        | .931        | .931        |
|              | Near       | <b>.762</b> | .950        | <b>.995</b> | .923        | .972        | <b>.763</b> | .956          | <b>.995</b> | .929        | .975        | .975        | .975        |
| pMauve       | All        | .693        | <b>.999</b> | .981        | <b>.999</b> | .990        | .690        | .998          | .975        | .998        | .987        | .987        | .987        |
|              | No repeats | .693        | <b>.999</b> | .981        | <b>.999</b> | .990        | .690        | .998          | .975        | .998        | .987        | .987        | .987        |
|              | Repeats    | .846        | <b>.999</b> | .953        | <b>.999</b> | .976        | .814        | <b>.984</b>   | .941        | <b>.984</b> | <b>.962</b> | <b>.962</b> | <b>.962</b> |
|              | Near       | .731        | <b>.999</b> | .983        | <b>.999</b> | .991        | .728        | <b>.999</b>   | .977        | <b>.999</b> | .988        | .988        | .988        |

Table 6: Comparisons using the Evolver Primates dataset. Format of the table is the same as in Table 1 of the main paper.

Evolver Primates Simulation

| Program      | Class      | Human-Orang |             |             |             |             |  | Chimp-Gorilla |             |             |             |             |  |
|--------------|------------|-------------|-------------|-------------|-------------|-------------|--|---------------|-------------|-------------|-------------|-------------|--|
|              |            | Burn-In     |             | No Burn-In  |             | F1          |  | Burn-In       |             | No Burn-In  |             | F1          |  |
|              |            | R.          | P.          | R.          | P.          |             |  | R.            | P.          | R.          | P.          |             |  |
| Cactus       | All        | .707        | .992        | .991        | .980        | <b>.992</b> |  | <b>.708</b>   | .993        | <b>.989</b> | .980        | <b>.991</b> |  |
|              | No repeats | .707        | .992        | .991        | .980        | .992        |  | <b>.708</b>   | .993        | <b>.989</b> | .980        | <b>.991</b> |  |
|              | Repeats    | .865        | .917        | .946        | .917        | .931        |  | <b>.808</b>   | .920        | <b>.940</b> | .920        | .930        |  |
|              | Near       | .746        | .993        | <b>.994</b> | .981        | .993        |  | <b>.747</b>   | .993        | <b>.991</b> | .981        | <b>.992</b> |  |
| Cactus(N.T.) | All        | .695        | <b>.998</b> | .987        | <b>.997</b> | <b>.992</b> |  | .697          | .998        | .985        | .998        | <b>.991</b> |  |
|              | No repeats | .695        | <b>.998</b> | .987        | <b>.997</b> | <b>.993</b> |  | .697          | .998        | .985        | .998        | <b>.991</b> |  |
|              | Repeats    | .879        | .969        | .961        | .969        | <b>.965</b> |  | <b>.808</b>   | .977        | <b>.940</b> | .977        | .958        |  |
|              | Near       | .734        | <b>.999</b> | .989        | <b>.998</b> | <b>.994</b> |  | .735          | <b>.999</b> | .986        | .998        | <b>.992</b> |  |
| Pecan        | All        | .687        | .997        | .976        | <b>.997</b> | .987        |  | .695          | <b>.999</b> | .983        | <b>.999</b> | <b>.991</b> |  |
|              | No repeats | .687        | .997        | .976        | <b>.997</b> | .987        |  | .695          | <b>.999</b> | .983        | <b>.999</b> | <b>.991</b> |  |
|              | Repeats    | .837        | .967        | .915        | .967        | .940        |  | <b>.808</b>   | <b>.992</b> | <b>.940</b> | <b>.992</b> | <b>.966</b> |  |
|              | Near       | .725        | .998        | .978        | <b>.998</b> | .988        |  | .733          | <b>.999</b> | .984        | <b>.999</b> | <b>.992</b> |  |
| TBA          | All        | .694        | .997        | .986        | <b>.997</b> | .991        |  | .695          | .996        | .983        | .996        | .990        |  |
|              | No repeats | .694        | .997        | .986        | <b>.997</b> | .991        |  | .695          | .996        | .983        | .996        | .990        |  |
|              | Repeats    | .872        | <b>.976</b> | .953        | <b>.976</b> | <b>.965</b> |  | <b>.808</b>   | .977        | <b>.940</b> | .977        | .958        |  |
|              | Near       | .733        | .998        | .988        | <b>.998</b> | .993        |  | .733          | .996        | .985        | .996        | .991        |  |
| TBA(ENCODE)  | All        | .713        | .979        | .988        | .954        | .983        |  | .695          | .995        | .984        | .995        | .989        |  |
|              | No repeats | .713        | .979        | .988        | .954        | .983        |  | .695          | .995        | .984        | .995        | .989        |  |
|              | Repeats    | .872        | .918        | .953        | .918        | .935        |  | <b>.808</b>   | .977        | <b>.940</b> | .977        | .958        |  |
|              | Near       | .754        | .980        | .990        | .955        | .985        |  | .733          | .996        | .985        | .996        | .991        |  |
| Multiz       | All        | <b>.719</b> | .953        | <b>.992</b> | .926        | .972        |  | .695          | .995        | .983        | .995        | .989        |  |
|              | No repeats | <b>.719</b> | .953        | <b>.992</b> | .926        | .972        |  | .695          | .995        | .983        | .995        | .989        |  |
|              | Repeats    | <b>.887</b> | .912        | <b>.969</b> | .912        | .940        |  | <b>.808</b>   | .977        | <b>.940</b> | .977        | .958        |  |
|              | Near       | <b>.760</b> | .955        | <b>.994</b> | .927        | .974        |  | .733          | .996        | .985        | .996        | .991        |  |
| pMauve       | All        | .678        | .989        | .964        | .989        | .977        |  | .689          | .998        | .974        | .998        | .986        |  |
|              | No repeats | .678        | .989        | .964        | .989        | .977        |  | .689          | .998        | .974        | .998        | .986        |  |
|              | Repeats    | .830        | .951        | .907        | .951        | .929        |  | <b>.808</b>   | .984        | <b>.940</b> | .984        | .962        |  |
|              | Near       | .716        | .991        | .966        | .991        | .978        |  | .726          | <b>.999</b> | .976        | <b>.999</b> | .987        |  |

Table 7: Comparisons using the Evolver Primates dataset. Format of the table is the same as in Table 1 of the main paper.

Evolver Primates Simulation

| Program      | Class      | Chimp-Orang |             |             |             |             |  | Gorilla-Orang |             |             |             |             |  |
|--------------|------------|-------------|-------------|-------------|-------------|-------------|--|---------------|-------------|-------------|-------------|-------------|--|
|              |            | Burn-In     |             | No Burn-In  |             | F1          |  | Burn-In       |             | No Burn-In  |             | F1          |  |
|              |            | R.          | P.          | R.          | P.          |             |  | R.            | P.          | R.          | P.          |             |  |
| Cactus       | All        | <b>.705</b> | .992        | <b>.990</b> | .980        | <b>.991</b> |  | <b>.707</b>   | .992        | <b>.991</b> | .980        | <b>.992</b> |  |
|              | No repeats | <b>.705</b> | .992        | <b>.990</b> | .980        | <b>.991</b> |  | <b>.707</b>   | .992        | <b>.991</b> | .980        | <b>.992</b> |  |
|              | Repeats    | .846        | .910        | .931        | .910        | .920        |  | .840          | .926        | .955        | .926        | .940        |  |
|              | Near       | <b>.745</b> | .993        | <b>.992</b> | .981        | <b>.993</b> |  | <b>.746</b>   | .993        | <b>.993</b> | .981        | <b>.993</b> |  |
| Cactus(N.T.) | All        | .694        | <b>.998</b> | .985        | <b>.997</b> | <b>.991</b> |  | .694          | <b>.998</b> | .985        | <b>.997</b> | .991        |  |
|              | No repeats | .694        | <b>.998</b> | .985        | <b>.997</b> | <b>.991</b> |  | .694          | <b>.998</b> | .985        | <b>.997</b> | .991        |  |
|              | Repeats    | <b>.860</b> | .969        | <b>.946</b> | .969        | <b>.957</b> |  | <b>.853</b>   | .977        | <b>.970</b> | .977        | <b>.973</b> |  |
|              | Near       | .733        | <b>.998</b> | .988        | <b>.998</b> | <b>.993</b> |  | .733          | <b>.999</b> | .987        | <b>.998</b> | <b>.993</b> |  |
| Pecan        | All        | .684        | .997        | .972        | <b>.997</b> | .985        |  | .686          | .997        | .974        | <b>.997</b> | .985        |  |
|              | No repeats | .684        | .997        | .972        | <b>.997</b> | .985        |  | .686          | .997        | .974        | <b>.997</b> | .985        |  |
|              | Repeats    | .818        | <b>.975</b> | .900        | <b>.975</b> | .936        |  | .820          | .984        | .932        | .984        | .957        |  |
|              | Near       | .723        | <b>.998</b> | .975        | <b>.998</b> | .986        |  | .724          | .998        | .976        | <b>.998</b> | .987        |  |
| TBA          | All        | .692        | .995        | .984        | .995        | .989        |  | .692          | .996        | .983        | .996        | .989        |  |
|              | No repeats | .692        | .995        | .984        | .995        | .989        |  | .692          | .996        | .983        | .996        | .989        |  |
|              | Repeats    | .853        | .968        | .938        | .968        | .953        |  | .833          | <b>.992</b> | .947        | <b>.992</b> | .969        |  |
|              | Near       | .731        | .996        | .986        | .996        | .991        |  | .731          | .997        | .986        | .997        | .991        |  |
| TBA(ENCODE)  | All        | .693        | .994        | .984        | .994        | .989        |  | .693          | .996        | .984        | .996        | .990        |  |
|              | No repeats | .693        | .994        | .984        | .994        | .989        |  | .693          | .996        | .984        | .996        | .990        |  |
|              | Repeats    | <b>.860</b> | .961        | <b>.946</b> | .961        | .953        |  | .840          | .984        | .955        | .984        | .969        |  |
|              | Near       | .732        | .995        | .987        | .995        | .991        |  | .732          | .997        | .986        | .997        | .991        |  |
| Multiz       | All        | .693        | .994        | .984        | .994        | .989        |  | .693          | .996        | .984        | .996        | .990        |  |
|              | No repeats | .693        | .994        | .984        | .994        | .989        |  | .693          | .996        | .984        | .996        | .990        |  |
|              | Repeats    | .853        | .961        | .938        | .961        | .949        |  | .847          | .984        | .962        | .984        | <b>.973</b> |  |
|              | Near       | .731        | .996        | .987        | .996        | .991        |  | .732          | .997        | .987        | .997        | .992        |  |
| pMauve       | All        | .676        | .989        | .961        | .989        | .975        |  | .677          | .989        | .961        | .989        | .975        |  |
|              | No repeats | .676        | .989        | .961        | .989        | .975        |  | .677          | .989        | .961        | .989        | .975        |  |
|              | Repeats    | .818        | .944        | .900        | .944        | .921        |  | .820          | .969        | .932        | .969        | .950        |  |
|              | Near       | .714        | .990        | .964        | .990        | .977        |  | .715          | .990        | .964        | .990        | .977        |  |

Table 8: Comparisons using the Evolver Primates dataset. Format of the table is the same as in Table 1 of the main paper.

| Primates |          |              |        |        |         |
|----------|----------|--------------|--------|--------|---------|
| Exon Id  | Gene     | Accession    | Cactus | Multiz | Comment |
| 1        | TSEN34   | NM_001077446 | C      | N      | IE      |
| 2        | KIR2DL3  | NM_015868    | C      | N      | IE      |
| 7        | KIR2DL3  | NM_015868    | C      | N      | IE      |
| 7        | KIR2DL1  | NM_014218    | C      | N      | IE      |
| 8        | GART     | NM_000819    | C      | N      | IE      |
| 0        | GART     | NM_000819    | C      | N      | IE      |
| 12       | LILRB3   | NM_001081450 | C      | N      | NA      |
| 11       | LILRB3   | NM_001081450 | C      | N      | NA      |
| 10       | LILRB3   | NM_001081450 | C      | N      | NA      |
| 9        | LILRB3   | NM_001081450 | C      | N      | NA      |
| 8        | LILRB3   | NM_001081450 | C      | N      | NA      |
| 7        | LILRB3   | NM_001081450 | C      | N      | NA      |
| 6        | LILRB3   | NM_001081450 | C      | N      | NA      |
| 4        | LILRB3   | NM_001081450 | C      | N      | NA      |
| 3        | LILRB3   | NM_001081450 | C      | N      | NA      |
| 2        | LILRB3   | NM_001081450 | C      | N      | NA      |
| 1        | LILRB3   | NM_001081450 | C      | N      | NA      |
| 0        | LILRB3   | NM_001081450 | C      | N      | NA      |
| 7        | LILRA6   | NM_024318    | C      | N      | NA      |
| 12       | LILRB5   | NM_001081442 | C      | N      | NA      |
| 11       | LILRB5   | NM_001081442 | C      | N      | NA      |
| 10       | LILRB5   | NM_001081442 | C      | N      | NA      |
| 8        | LILRB5   | NM_001081442 | C      | N      | NA      |
| 7        | LILRB5   | NM_001081442 | C      | N      | NA      |
| 6        | LILRB5   | NM_001081442 | C      | N      | NA      |
| 4        | LILRB5   | NM_001081442 | C      | N      | NA      |
| 3        | LILRB5   | NM_001081442 | C      | N      | NA      |
| 2        | LILRB5   | NM_001081442 | C      | N      | NA      |
| 1        | LILRB5   | NM_001081442 | C      | N      | NA      |
| 0        | LILRB5   | NM_001081442 | C      | N      | NA      |
| 12       | LILRB2   | NM_005874    | C      | N      | NA      |
| 11       | LILRB2   | NM_005874    | C      | N      | NA      |
| 10       | LILRB2   | NM_005874    | C      | N      | NA      |
| 9        | LILRB2   | NM_005874    | C      | N      | NA      |
| 8        | LILRB2   | NM_005874    | C      | N      | NA      |
| 2        | LILRB2   | NM_005874    | C      | N      | NA      |
| 1        | LILRB2   | NM_005874    | C      | N      | NA      |
| 0        | LILRB2   | NM_005874    | C      | N      | NA      |
| 7        | C22orf42 | NM_001010859 | C      | N      | NA      |
| 5        | C22orf42 | NM_001010859 | C      | N      | NA      |
| 4        | C22orf42 | NM_001010859 | C      | N      | NA      |
| 3        | C22orf42 | NM_001010859 | C      | N      | NA      |
| 2        | C22orf42 | NM_001010859 | C      | N      | NA      |
| 1        | C22orf42 | NM_001010859 | C      | N      | NA      |
| 0        | C22orf42 | NM_001010859 | C      | N      | NA      |
| 0        | TEX28    | NM_001586    | C      | N      | NA      |
| 0        | OR52R1   | NM_001005177 | C      | N      | WH      |
| 0        | OR51T1   | NM_001004759 | C      | N      | WH      |
| 0        | OR51L1   | NM_001004755 | C      | N      | WH      |
| 0        | OR52J3   | NM_001001916 | C      | N      | WH      |
| 0        | OR52E2   | NM_001005164 | C      | N      | WH      |
| 1        | HBD      | NM_000519    | C      | N      | WH      |
| 1        | HBG1     | NM_000559    | C      | N      | WH      |
| 1        | HBG2     | NM_000184    | C      | N      | WH      |
| 0        | OR51B6   | NM_001004750 | C      | N      | WH      |
| 1        | AXIN1    | NM_003502    | C      | N      | WH      |
| 4        | LILRA6   | NM_024318    | C      | N      | WH      |
| 7        | LILRB2   | NM_005874    | C      | N      | WH      |
| 6        | LILRB2   | NM_005874    | C      | N      | WH      |
| 5        | LILRB2   | NM_005874    | C      | N      | WH      |
| 4        | LILRB2   | NM_005874    | C      | N      | WH      |
| 5        | LILRA3   | NM_006865    | C      | N      | WH      |
| 2        | LILRA3   | NM_006865    | C      | N      | WH      |
| 8        | LAIR1    | NM_002287    | C      | N      | WH      |
| 0        | LAIR1    | NM_002287    | C      | N      | WH      |
| 4        | LILRA1   | NM_006863    | C      | N      | WH      |
| 4        | LILRB4   | NM_006847    | C      | N      | WH      |
| 6        | KIR2DL3  | NM_015868    | C      | N      | WH      |
| 6        | KIR2DL4  | NM_002255    | C      | N      | WH      |
| 14       | ITSN1    | NM_003024    | C      | N      | WH      |
| 3        | RFPL2    | NM_001098527 | C      | N      | WH      |
| 1        | RFPL2    | NM_001098527 | C      | N      | WH      |
| 1        | CTAG1A   | NM_139250    | C      | N      | WH      |
| 1        | CTAG1B   | NM_001327    | C      | N      | WH      |
| 3        | FUNDC2   | NM_023934    | C      | N      | WH      |

Table 9: Exons that are conserved in Cactus, but non-conserved in Multiz. C: Conserved, N: Non-conserved, WH: Wrong Homolog, in which a non-conserved sequence is aligned in preference to a more closely homologous sequence in one or more species, IE: Indel Error, in which the alignment contains a pattern of indels in all the sequences from one or more species that prevent the sequences from being considered conserved, NA: Not Aligned, where no sequence is aligned in one or more species.

| Primates |         |           |        |        |         |
|----------|---------|-----------|--------|--------|---------|
| Exon Id  | Gene    | Accession | Cactus | Multiz | Comment |
| 0        | OR51B2  | NM_033180 | N      | C      | NA      |
| 5        | LILRA4  | NM_012276 | N      | C      | NA      |
| 4        | LILRA4  | NM_012276 | N      | C      | NA      |
| 3        | LILRA4  | NM_012276 | N      | C      | NA      |
| 2        | LILRA4  | NM_012276 | N      | C      | NA      |
| 1        | LILRA4  | NM_012276 | N      | C      | NA      |
| 0        | LILRA4  | NM_012276 | N      | C      | NA      |
| 5        | KIR2DL1 | NM_014218 | N      | C      | NA      |
| 6        | SLC22A4 | NM_003059 | N      | C      | NA      |
| 7        | SLC22A4 | NM_003059 | N      | C      | NA      |
| 5        | LILRA6  | NM_024318 | N      | C      | WH      |

Table 10: Exons that are conserved in Multiz, but non-conserved in Cactus. Same format as Table 9.

| Primates loci reconstruction dataset |         |             |           |           |
|--------------------------------------|---------|-------------|-----------|-----------|
| Region                               | Species | Chromosome  | Start     | End       |
| ENm001                               | hg18    | chr7        | 115597756 | 117475182 |
|                                      | panTro2 | chr7        | 116358580 | 118271369 |
|                                      | ponAbe2 | chr7_random | 15766758  | 15905393  |
|                                      |         | chr7        | 112761783 | 114610423 |
| ENm002                               | rheMac2 | chr3        | 153523204 | 155364336 |
|                                      | hg18    | chr5        | 131284313 | 132284313 |
|                                      | panTro2 | chr5        | 133541207 | 134551980 |
|                                      | ponAbe2 | chr5        | 133353386 | 134373402 |
| ENm003                               | rheMac2 | chr6        | 128348108 | 129327973 |
|                                      | hg18    | chr11       | 115962315 | 116462315 |
|                                      | panTro2 | chr11       | 115397026 | 115908101 |
|                                      | ponAbe2 | chr11       | 113509259 | 114016230 |
| ENm004                               | rheMac2 | chr14       | 114993392 | 115485494 |
|                                      | hg18    | chr22       | 30133953  | 31833953  |
|                                      | panTro2 | chr22       | 30294491  | 32011499  |
|                                      | ponAbe2 | chr22       | 26374071  | 28234221  |
| ENm005                               | rheMac2 | chr10       | 75300555  | 77028038  |
|                                      |         | chr10       | 88219525  | 88274424  |
|                                      | hg18    | chr21       | 32668236  | 34364221  |
|                                      | panTro2 | chr21       | 32122073  | 33817412  |
| ENm006                               | ponAbe2 | chr21       | 33317601  | 35079767  |
|                                      | rheMac2 | chr19       | 8303957   | 8346701   |
|                                      |         | chr3        | 12498479  | 14135229  |
|                                      | hg18    | chrX        | 152767491 | 154063081 |
| ENm007                               | panTro2 | chrX        | 153291711 | 154485343 |
|                                      | ponAbe2 | chrX        | 154044151 | 155368060 |
|                                      | rheMac2 | chrX        | 151961488 | 153195575 |
|                                      |         | chr19       | 59023584  | 60024460  |
| ENm008                               | hg18    | chr19       | 59513067  | 60564353  |
|                                      | panTro2 | chr19       | 55606585  | 56682663  |
|                                      | rheMac2 | chr19       | 59953290  | 60901251  |
|                                      |         | chr16       | 45        | 500000    |
| ENm009                               | hg18    | chr16       | 20539     | 520583    |
|                                      | panTro2 | chr16       | 4664777   | 4675171   |
|                                      | ponAbe2 | chrX        | 156177209 | 156188089 |
|                                      |         | chr16       | 10000     | 522714    |
| ENm010                               | rheMac2 | chr2b       | 21132250  | 21142279  |
|                                      |         | chr20       | 458       | 494348    |
|                                      | rheMac2 | chr13       | 113700995 | 113708122 |
|                                      |         | chr15       | 61543     | 73215     |
| ENm011                               | hg18    | chr11       | 4730995   | 5732587   |
|                                      | panTro2 | chr11       | 4579020   | 5592480   |
|                                      | ponAbe2 | chr11       | 64509194  | 65984125  |
|                                      | rheMac2 | chr14       | 67368393  | 68925291  |
| ENm012                               | hg18    | chr7        | 26924045  | 27424045  |
|                                      | panTro2 | chr7        | 27260287  | 27768256  |
|                                      | ponAbe2 | chr7        | 57012283  | 57540815  |
|                                      | rheMac2 | chr22       | 98807544  | 99304888  |

Table 11: Input sequences for loci alignment. ‘Region’: name of the encode pilot region. ‘Species’: UCSC species assembly name. ‘Start’ and ‘End’: the locations of input sequences on the positive
